# Supplementary material for: Prospective Assessment of Risk Factors Influencing Facial Nerve Paresis in Patients after Surgery for Parotid Gland Tumors
Source: MDPI journal article supplement (doi:10.3390/medicina58121726), 2022-11-25
Supplement: s1 [file s1]

Table S1. Assessment of the Relationship between Postoperative Facial Nerve Paresis and Selected Risk Factors. An order regression analysis.

|           |                                                  | 95% CI for B |      |      |    |              |        |       |          | 95% CI for OR |            |
|-----------|--------------------------------------------------|--------------|------|------|----|--------------|--------|-------|----------|---------------|------------|
|           |                                                  | B            | SE   | Wald | df | p            | LL     | UL    | OR       | LL            | UL         |
| Threshold | [degree of paresis = 1,00]                       | -5,90        | 7,05 | 0,70 | 1  | 0,403        | -19,71 | 7,92  | 0,003    | 0,00          | 2741,68    |
|           | [degree of paresis = 2,00]                       | 0,52         | 6,66 | 0,01 | 1  | 0,938        | -12,53 | 13,57 | 1,675    | 0,00          | 779256,45  |
| Location  | age years                                        | 0,03         | 0,05 | 0,40 | 1  | 0,527        | -0,07  | 0,14  | 1,034    | 0,93          | 1,15       |
|           | duration of surgery min                          | 0,04         | 0,02 | 3,61 | 1  | <b>0,058</b> | 0,00   | 0,08  | 1,037    | 1,00          | 1,08       |
|           | Time from tumor diagnosis months                 | 0,01         | 0,01 | 0,44 | 1  | 0,510        | -0,02  | 0,04  | 1,009    | 0,98          | 1,04       |
|           | OCULI amplitude sympt/asympt 1 exam              | -2,76        | 2,46 | 1,26 | 1  | 0,262        | -7,59  | 2,07  | 0,063    | 0,00          | 7,88       |
|           | OCULI stand latency sympt/asympt 1 exam          | 1,90         | 1,40 | 1,86 | 1  | 0,172        | -0,83  | 4,64  | 6,714    | 0,44          | 103,52     |
|           | ORIS amplitude sympt/asympt 1 exam               | -2,61        | 2,47 | 1,12 | 1  | 0,291        | -7,45  | 2,23  | 0,073    | 0,00          | 9,32       |
|           | [sex=1,00]                                       | 4,09         | 1,81 | 5,13 | 1  | <b>0,024</b> | 0,55   | 7,62  | 59,494   | 1,73          | 2044,88    |
|           | [histological type=1,00]                         | -5,11        | 2,05 | 6,21 | 1  | <b>0,013</b> | -9,12  | -1,09 | 0,006    | 0,00          | ,34        |
|           | [histological type =2,00]                        | -3,54        | 1,71 | 4,28 | 1  | <b>0,039</b> | -6,90  | -0,19 | 0,029    | 0,00          | ,83        |
|           | [size of the tumor=1,00]                         | -5,66        | 2,78 | 4,16 | 1  | <b>0,041</b> | -11,10 | -0,22 | 0,003    | 0,00          | ,80        |
|           | [size of the tumor=2,00]                         | -2,60        | 1,90 | 1,87 | 1  | 0,172        | -6,32  | 1,13  | 0,075    | 0,00          | 3,08       |
|           | [tumor location=1,00]                            | 8,08         | 3,70 | 4,78 | 1  | <b>0,029</b> | 0,84   | 15,32 | 3230,969 | 2,31          | 4515261,58 |
|           | [tumor location=2,00]                            | 4,97         | 3,19 | 2,43 | 1  | 0,119        | -1,28  | 11,22 | 143,772  | 0,28          | 74644,02   |
|           | [type of parotidectomy=1,00]                     | -6,36        | 3,33 | 3,65 | 1  | <b>0,056</b> | -12,88 | 0,16  | 0,002    | 0,00          | 1,18       |
|           | [type of parotidectomy=2,00]                     | -6,89        | 3,73 | 3,40 | 1  | <b>0,065</b> | -14,21 | 0,43  | 0,001    | 0,00          | 1,54       |
|           | [intraoperative bleeding=1,00]                   | -6,68        | 3,24 | 4,24 | 1  | <b>0,039</b> | -13,04 | -0,32 | 0,001    | 0,00          | ,72        |
|           | [intraoperative bleeding=2,00]                   | -6,58        | 2,85 | 5,34 | 1  | <b>0,021</b> | -12,16 | -1,00 | 0,001    | 0,00          | ,37        |
|           | [electrocoagulation <1.5 cm from the nerve=1,00] | 0,12         | 1,35 | 0,01 | 1  | 0,930        | -2,54  | 2,77  | 1,126    | 0,08          | 15,99      |
|           | [wrapped tumor=1,00]                             | 0,19         | 1,52 | 0,02 | 1  | 0,901        | -2,79  | 3,17  | 1,208    | 0,06          | 23,75      |
|           | [other complaints=1,00]                          | -5,34        | 2,42 | 4,87 | 1  | <b>0,027</b> | -10,09 | -0,60 | 0,005    | 0,00          | ,55        |
|           | [2-fold increase in tumor size in 1 month=1,00]  | -1,32        | 3,10 | 0,18 | 1  | 0,670        | -7,39  | 4,75  | 0,267    | 0,00          | 115,49     |
|           | [diabetes=1,00]                                  | -1,03        | 1,93 | 0,28 | 1  | 0,596        | -4,81  | 2,76  | 0,359    | 0,01          | 15,81      |
|           | [malabsorption=1,00]                             | -0,96        | 3,16 | 0,09 | 1  | 0,762        | -7,16  | 5,24  | 0,383    | 0,00          | 188,69     |
|           | [stimulants=1,00]                                | 3,40         | 2,53 | 1,81 | 1  | 0,178        | -1,55  | 8,36  | 30,058   | 0,21          | 4253,01    |
